# Supplementary material for: Development and Validation of a Housing First Fidelity Survey
Source: Atypon-hosted journal article supplement (doi:10.1176/appi.ps.201200500), 2013-09-01
Supplement: 911_ds001.pdf [file 911_ds001.pdf]

**Housing First Fidelity Survey**

FINAL: 7.18.2012

Please select the answer choice that best describes the **housing process and structure** that this program offers its participants (Questions 1-2).

**1.** What percent of participants live in housing that is considered emergency, short-term, transitional, or time-limited, in that participants are expected to move when either standardized criteria or individual milestones are met?

| 0-14% | 15-29% | 30-44% | 45-59% | 60-84% | 85-100% |
|-------|--------|--------|--------|--------|---------|
| 46%   | 27%    | 8%     | 9%     | 6%     | 8%      |

**2.** What percent of participants live in scattered-site permanent supported housing, wherein less than 20% of the units are leased by the program?

| 0-14% | 15-29% | 30-44% | 45-59% | 60-84% | 85-100% |
|-------|--------|--------|--------|--------|---------|
| 48%   | 12%    | 6%     | 8%     | 12%    | 14%     |

Please select the answer choice that best describes **how housing and services are related** in this program (Questions 3-4).

**3.** What requirements do program participants have to meet in order to gain access to permanent housing? (choose all that apply)

|                                                                                                         |                                                  |                            |                               |                                                                                                               |                                            |                                              |
|---------------------------------------------------------------------------------------------------------|--------------------------------------------------|----------------------------|-------------------------------|---------------------------------------------------------------------------------------------------------------|--------------------------------------------|----------------------------------------------|
| Completion of a period of time in transitional housing, outpatient, inpatient, or residential treatment | Sobriety or abstinence from alcohol and/or drugs | Compliance with medication | Psychiatric symptom stability | Willingness to comply with a treatment plan that addresses sobriety, abstinence, and/or medication compliance | Agreeing to face-to-face visits with staff | Meeting responsibilities of a standard lease |
| 27%                                                                                                     | 25%                                              | 24%                        | 32%                           | 45%                                                                                                           | 73%                                        | 78%                                          |

**4. If yes,** which of the following provisions does the lease or agreement contain? (choose all that apply)

|                                                                                 |                                                                                     |                                                                  |                                                                                     |
|---------------------------------------------------------------------------------|-------------------------------------------------------------------------------------|------------------------------------------------------------------|-------------------------------------------------------------------------------------|
| Provisions regarding adherence to medication, sobriety, and/or a treatment plan | Provisions regarding adherence to program rules such as curfews or overnight guests | Provisions regarding adherence to face-to-face visits with staff | Provisions regarding creating behavioral disturbances with respect to other tenants |
| 20%                                                                             | 52%                                                                                 | 29%                                                              | 74%                                                                                 |

Please select the answer choice that best describes the **service philosophy** of this program (Questions 5-8).

**5. To what extent do program participants choose the type, sequence, and intensity of services on an ongoing basis?**

|                                                                                        |                                                                                                                                |                                                                                                                           |                                                                                                                                             |
|----------------------------------------------------------------------------------------|--------------------------------------------------------------------------------------------------------------------------------|---------------------------------------------------------------------------------------------------------------------------|---------------------------------------------------------------------------------------------------------------------------------------------|
| Services are chosen by the service provider, with little no input from the participant | Participants have some say in choosing, modifying, or refusing services, although program staff determinations usually prevail | Participants have some say in choosing, modifying, or refusing services, although participant preferences usually prevail | Participants have the right to choose, modify, or refuse services and supports at any time, except one face-to-face visit with staff a week |
| 1%                                                                                     | 9%                                                                                                                             | 27%                                                                                                                       | 63%                                                                                                                                         |

**6. What are the requirements for participants with serious mental illness (SMI) to take medication or participate in psychiatric treatment such as attending groups or seeing a psychiatrist?**

|                                                                                           |                                                                                                                     |                                                                                                                               |                                                                                           |
|-------------------------------------------------------------------------------------------|---------------------------------------------------------------------------------------------------------------------|-------------------------------------------------------------------------------------------------------------------------------|-------------------------------------------------------------------------------------------|
| All participants with SMI are required to take medication and/or participate in treatment | Most participants with SMI are required to take medication and/or participate in treatment, but exceptions are made | Participants with SMI who have not achieved symptom stability are required to take medication and/or participate in treatment | Participants with SMI are not required to take medication and/or participate in treatment |
| 8%                                                                                        | 17%                                                                                                                 | 8%                                                                                                                            | 67%                                                                                       |

**7. What are the requirements for participants with substance abuse (SA) disorders to participate in SA treatment such as inpatient treatment, attending groups, or counseling with a substance use specialist?**

|                                                                                                                          |                                                                                                                        |                                                                                                             |                                                                                |
|--------------------------------------------------------------------------------------------------------------------------|------------------------------------------------------------------------------------------------------------------------|-------------------------------------------------------------------------------------------------------------|--------------------------------------------------------------------------------|
| All participants with SA disorders, regardless of current use or abstinence, are required to participate in SA treatment | Participants with SA disorders who have not achieved a specified period of abstinence must participate in SA treatment | Participants with SA disorders who are currently actively using substances must participate in SA treatment | Participants with SA disorders are not required to participate in SA treatment |
| 4%                                                                                                                       | 3%                                                                                                                     | 12%                                                                                                         | 81%                                                                            |

**8. What is the program's approach to substance use among participants?**

|                                                                             |                                                                                                  |                                                                                                                            |                                                                                                                                                                                                        |
|-----------------------------------------------------------------------------|--------------------------------------------------------------------------------------------------|----------------------------------------------------------------------------------------------------------------------------|--------------------------------------------------------------------------------------------------------------------------------------------------------------------------------------------------------|
| Participants are required to abstain from alcohol and/or drugs at all times | Participants are required to abstain from alcohol and/or drugs while they are in their residence | Participants are not required to abstain from alcohol and/or drugs, but staff work with participants to achieve abstinence | Participants are not required to abstain from alcohol and/or drugs, but staff work with participants to reduce the negative consequences of use and/or utilize appropriate stage matched interventions |
| 5%                                                                          | 2%                                                                                               | 16%                                                                                                                        | 76%                                                                                                                                                                                                    |

Please select the answer choice that best describes the **service array** of this program (Questions 9-14).

**9. What types of services, if any, are available to participants who are in need of substance use treatment? (choose all that apply)**

|                                                    |                                                    |                                            |                                       |                                                                          |
|----------------------------------------------------|----------------------------------------------------|--------------------------------------------|---------------------------------------|--------------------------------------------------------------------------|
| Substance use treatment services are not available | Systematic and integrated screening and assessment | Interventions tailored to change readiness | Outreach or motivational interviewing | CBT, relapse prevention, or other EBP or Promising Practice (e.g. BRITE) |
| 2%                                                 | 55%                                                | 84%                                        | 87%                                   | 61%                                                                      |

**10. What types of services, if any, are available to participants who are interested in paid employment opportunities? (choose all that apply)**

|                                       |                       |                                                       |                                                            |                            |
|---------------------------------------|-----------------------|-------------------------------------------------------|------------------------------------------------------------|----------------------------|
| Employment services are not available | Vocational assessment | Individualized short term employment (e.g. day labor) | In house work experience or sheltered work (e.g. Goodwill) | Community based employment |
| 3%                                    | 75%                   | 49%                                                   | 54%                                                        | 75%                        |

**11. What types of services, if any, are available to participants who are interested in education? (choose all that apply)**

|                                        |                        |                                                |                                                                  |                                                               |
|----------------------------------------|------------------------|------------------------------------------------|------------------------------------------------------------------|---------------------------------------------------------------|
| Educational services are not available | Educational assessment | In house education (e.g. literacy remediation) | Adult school, vocational training, trade school / apprenticeship | Supported education in the community (e.g. community college) |
| 1%                                     | 57%                    | 26%                                            | 84%                                                              | 88%                                                           |

**12. What types of services, if any, are available to participants who are interested in volunteering? (choose all that apply)**

|                                         |                                                 |                                        |                                                       |                              |
|-----------------------------------------|-------------------------------------------------|----------------------------------------|-------------------------------------------------------|------------------------------|
| Volunteering services are not available | Volunteering capability and interest assessment | Individualized short term volunteering | In house volunteer experience or sheltered experience | Community based volunteering |
| 0%                                      | 53%                                             | 63%                                    | 57%                                                   | 93%                          |

**13. What types of services, if any, are available to participants who have medical (physical health) issues? (choose all that apply)**

|                                                    |                                                           |                                                |                                                                      |                                                    |                                                               |
|----------------------------------------------------|-----------------------------------------------------------|------------------------------------------------|----------------------------------------------------------------------|----------------------------------------------------|---------------------------------------------------------------|
| Medical/physical health services are not available | Screening for medical problems or medication side effects | Managing medication related to physical health | Communicating and coordinating services with other medical providers | Health promotion, prevention, education activities | On-site diagnosis and treatment of physical health conditions |
| 1%                                                 | 70%                                                       | 56%                                            | 95%                                                                  | 78%                                                | 15%                                                           |

**14. What types of social integration services, if any, are available to participants? (choose all that apply)?**

|                                               |                                                                                      |                                                                                  |                                                                                                                                                            |                                                                                                                                      |                                                                                                                                                                |
|-----------------------------------------------|--------------------------------------------------------------------------------------|----------------------------------------------------------------------------------|------------------------------------------------------------------------------------------------------------------------------------------------------------|--------------------------------------------------------------------------------------------------------------------------------------|----------------------------------------------------------------------------------------------------------------------------------------------------------------|
| Social integration services are not available | Basic social skills training (e.g., maintaining eye contact, holding a conversation) | Group recreational/ leisure activities (lunches, sporting events, senior center) | One-on-one support for developing social competencies (e.g., help with empowerment, resolving problems with members of social network, establishing trust) | Services to help support or expand participants' social roles (e.g., employee / volunteer, sibling / parent / grandparent, neighbor) | Support for activities pertaining to citizenship or civic participation (e.g., help with advocacy, voting, community involvement, faith community involvement) |
| 0%                                            | 95%                                                                                  | 90%                                                                              | 97%                                                                                                                                                        | 90%                                                                                                                                  | 75%                                                                                                                                                            |

Please select the answer choice that best describes the **team structure/human resources** of this program (Questions 15-16).

**15. How often do program staff meet to plan and review services for participants?**

|                                              |                                    |                                   |                                      |                                             |
|----------------------------------------------|------------------------------------|-----------------------------------|--------------------------------------|---------------------------------------------|
| Program staff meet less than one day a month | Program staff meet 1 day per month | Program staff meet 1 day per week | Program staff meet 2-3 days per week | Program staff meet at least 4 days per week |
| 2%                                           | 2%                                 | 29%                               | 26%                                  | 41%                                         |

**16. To what extent does the program use its team meetings to meet the following functions? (choose all that apply)**

|                                                                                                                     |                                                                                       |                                                                            |                                                              |                                                      |
|---------------------------------------------------------------------------------------------------------------------|---------------------------------------------------------------------------------------|----------------------------------------------------------------------------|--------------------------------------------------------------|------------------------------------------------------|
| Conduct a brief, but clinically-relevant review of any participants with whom they had contact in the past 24 hours | Conduct a review of the long-term goals of all clients on a regularly scheduled basis | Develop a staff schedule based on participant schedules and emerging needs | Discuss need for proactive contacts to prevent future crises | Review previous staff assignments for follow through |
| 82%                                                                                                                 | 72%                                                                                   | 72%                                                                        | 97%                                                          | 87%                                                  |
